# Supplementary material
Source: Springer Nature journal article supplement (https://www.springermedizin.de/resource/supplementary/12880_2013_212_MOESM5_ESM.pdf/9450320)

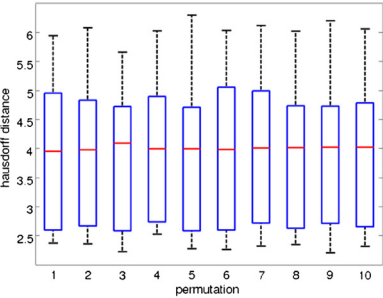

(a) Hausdorff

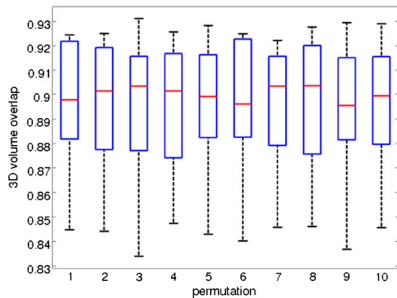

(b) Dice 3D

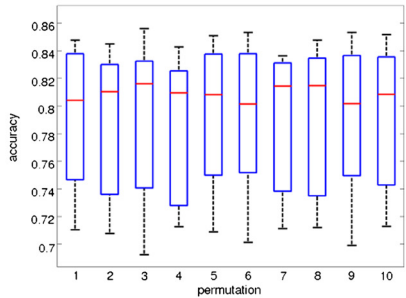

(c) Accuracy

Supplement: MOESM5 [file 9450320]
